# Supplementary material for: ENO2 as a Biomarker Regulating Energy Metabolism to Promote Tumor Progression in Clear Cell Renal Cell Carcinoma
Source: MDPI journal article supplement (doi:10.3390/biomedicines11092499), 2023-09-09
Supplement: s1 [file s1]

## Supplementary table

**Supplementary Table S1.** Univariate and multivariate analyses of ENO2 mRNA level and patient disease-free survival (DFS).

| Variable              | Univariate analysis |                    |        | Multivariate analysis <sup>c</sup> |              |        |
|-----------------------|---------------------|--------------------|--------|------------------------------------|--------------|--------|
|                       | HR <sup>a</sup>     | 95%CI <sup>b</sup> | P      | HR                                 | 95% CI       | P      |
| Disease-free survival |                     |                    |        |                                    |              |        |
| Age (years)           |                     |                    |        |                                    |              |        |
| ≤60 (n = 238)         | 1.468               | 0.930-2.318        | 0.099  |                                    |              |        |
| >60 (n = 198)         |                     |                    |        |                                    |              |        |
| Gender                |                     |                    |        |                                    |              |        |
| Female (n = 149)      | 1.144               | 0.699-1.873        | 0.591  |                                    |              |        |
| Male (n = 287)        |                     |                    |        |                                    |              |        |
| T stage               |                     |                    |        |                                    |              |        |
| T1 or T2 (n = 292)    | 6.556               | 3.923-10.956       | 0.000* |                                    |              |        |
| T3 or T4 (n = 144)    |                     |                    |        |                                    |              |        |
| N stage               |                     |                    |        |                                    |              |        |
| N0 (n = 192)          | 7.098               | 3.212-15.687       | 0.000* | 3.319                              | 1.490-7.392  | 0.003* |
| N1 (n = 13)           |                     |                    |        |                                    |              |        |
| M stage               |                     |                    |        |                                    |              |        |
| M0 (n = 354)          | 11.937              | 7.501-18.996       | 0.000* | 3.457                              | 1.797-6.650  | 0.000* |
| M1 (n = 53)           |                     |                    |        |                                    |              |        |
| G grade               |                     |                    |        |                                    |              |        |
| G1 or G2 (n = 210)    | 5.899               | 3.109-11.195       | 0.000* | 2.133                              | 1.000-4.549  | 0.050* |
| G3 or G4 (n = 219)    |                     |                    |        |                                    |              |        |
| TNM stage             |                     |                    |        |                                    |              |        |
| I+II (n = 279)        | 11.458              | 6.173-21.270       | 0.000* | 4.501                              | 1.743-11.362 | 0.002* |
| III+IV (n = 115)      |                     |                    |        |                                    |              |        |
| ENO2                  |                     |                    |        |                                    |              |        |
| Low(n = 225)          | 2.175               | 1.348-3.510        | 0.001* |                                    |              |        |
| High (n = 211)        |                     |                    |        |                                    |              |        |

a Hazard ratio, estimated from Cox proportional hazard regression model.

b Confidence interval of the estimated HR.

c Multivariate models were adjusted for N, M classification, G stage and TNM stage.

**Supplementary Table S2.** Correlation between ENO2 mRNA expression and clinicopathological parameters of ccRCC patients.

| Parameter   |                     | Number | ENO2 mRNA expression |      | P value |
|-------------|---------------------|--------|----------------------|------|---------|
|             |                     |        | Low                  | High |         |
| Age(years)  | <=60                | 267    | 138                  | 129  | 0.365   |
|             | >60                 | 270    | 129                  | 141  |         |
| gender      | female              | 191    | 112                  | 79   | 0.002*  |
|             | male                | 346    | 155                  | 191  |         |
| T stage     | T1+T2               | 344    | 187                  | 157  | 0.004*  |
|             | T3+T4               | 193    | 80                   | 113  |         |
| N stage     | N0                  | 239    | 125                  | 114  | 0.068   |
|             | N1                  | 17     | 5                    | 12   |         |
| M stage     | M0                  | 425    | 219                  | 206  | 0.166   |
|             | M1                  | 79     | 34                   | 45   |         |
| TNM stage   | I+II                | 326    | 181                  | 145  | 0.001*  |
|             | III+IV              | 208    | 85                   | 123  |         |
| Disease     | DiseaseFree         | 310    | 173                  | 137  | 0.006*  |
| Free Status | Recurred/Progressed | 128    | 53                   | 75   |         |

## Supplementary figure

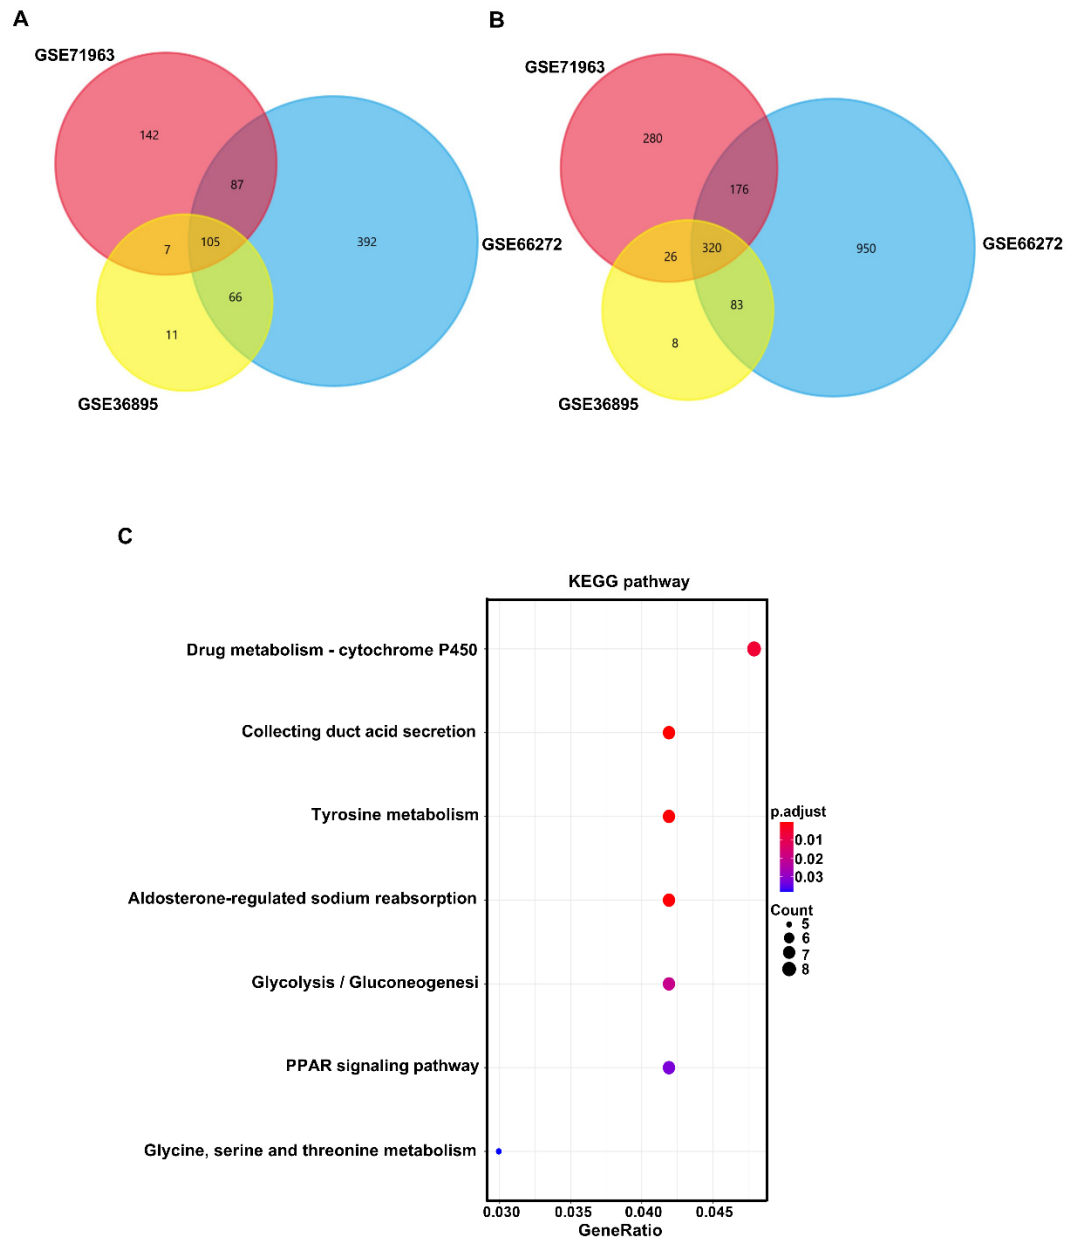

### Supplemental Figure S1. Identifying differentially expressed genes

Identify the DEGs of three ccRCC gene expression profile data GSE36895, GSE66272, GSE71963,  $p < 0.05$  and  $|FC| > 2$  are the screening criteria used. (A) 105 up-regulated DEGs in ccRCC. (B) 420 down-regulated DEGs in ccRCC. (C) Analysis of the down-regulated KEGG pathway,  $p \text{ value} < 0.05$  is considered a significant difference.

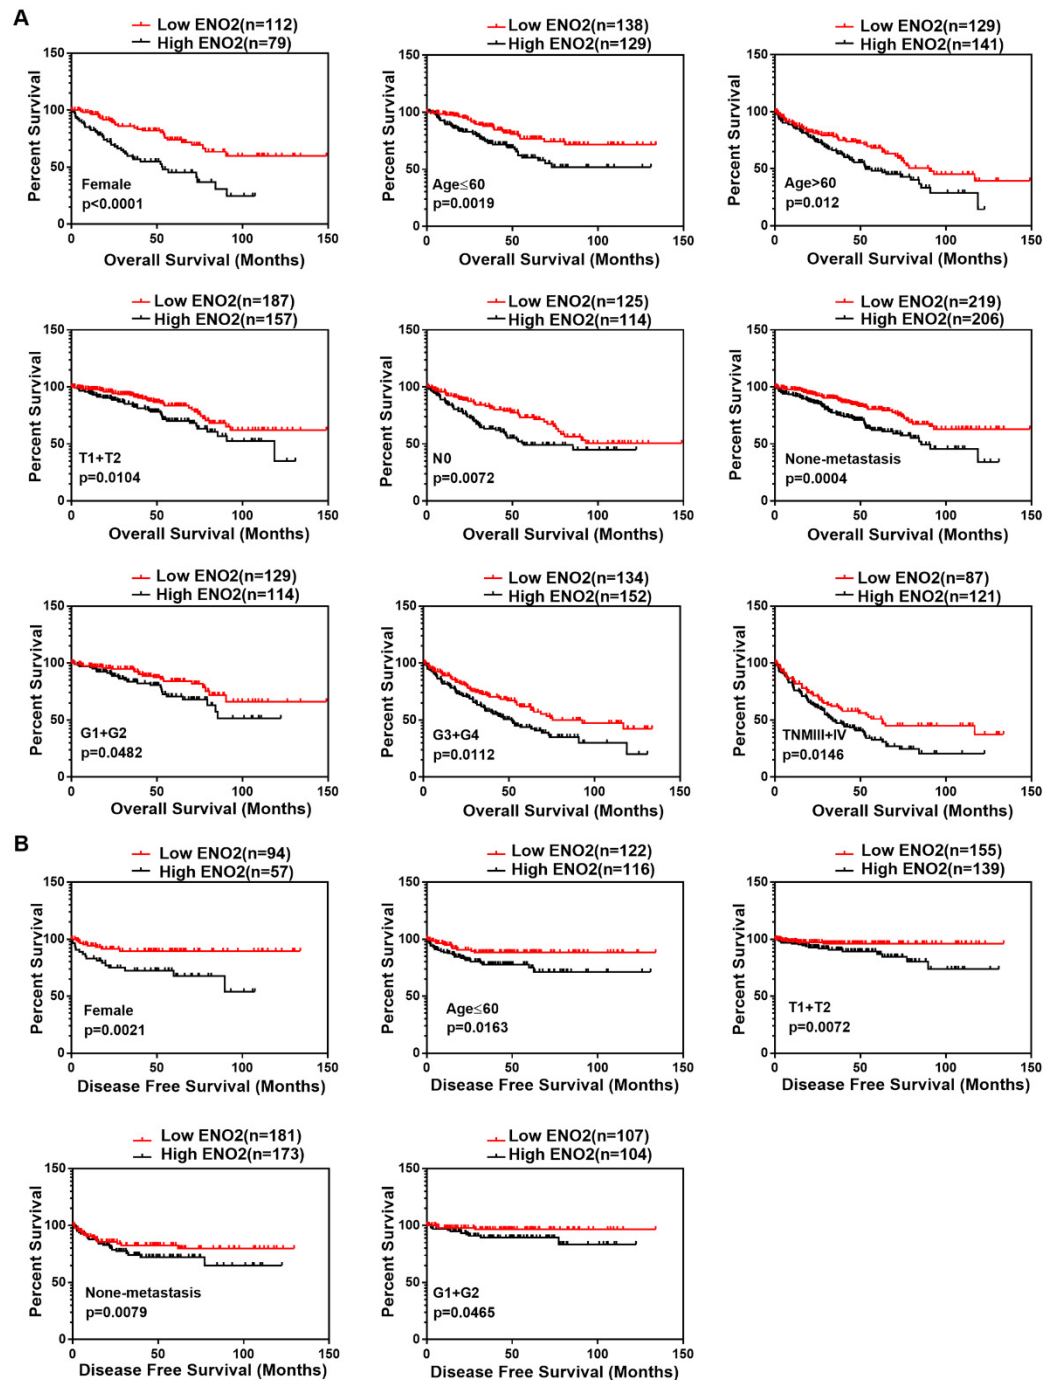

**Supplemental Figure S2. ENO2 is overexpressed and indicates poor survival in clear cell renal cell carcinoma**

(A) An analysis of Kaplan-Meier curves stratified by subgroups to determine overall survival. The p value is obtained through Log-rank (Mantel-Cox) test. (B) An analysis of Kaplan-Meier curves stratified by subgroups to determine disease-free survival. The p value is obtained through Log-rank (Mantel-Cox) test.

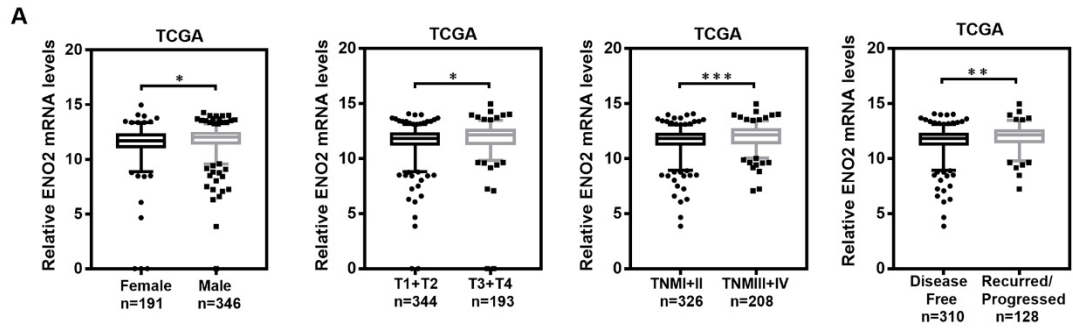

**Supplemental Figure S3. ENO2 expression correlates with clinicopathological parameters of clear cell renal cell carcinoma**

(A) The correlations between ENO2 expression and different clinicopathological parameters based on the data from the TCGA-KIRC database; t-test, \*\*\*\*  $P < 0.0001$ , \*\*\*  $P < 0.001$ , \*\*  $P < 0.01$ , and \*  $P < 0.05$  (Independent-Samples t-test for statistics).

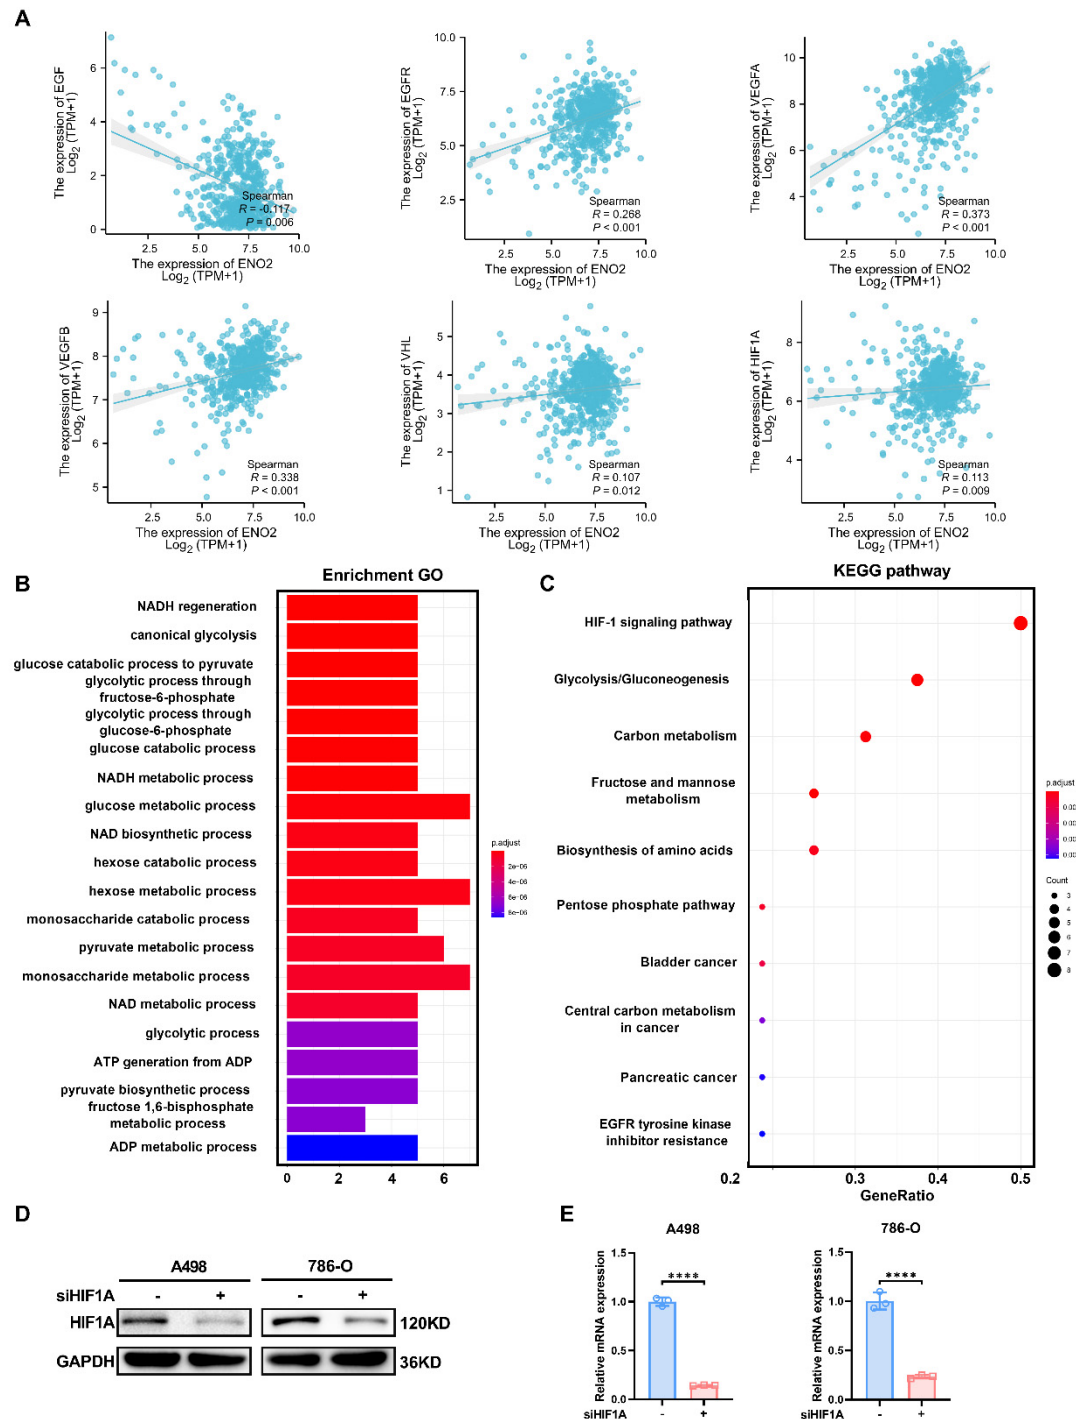

**Supplemental Figure S4. ENO2 is significantly related to important genes in ccRCC** (A) The correlation graph between ENO2 and EGF, EGFR, VEGFA, VEGFB, VHL, HIF1A expression based on the data from the TCGA-KIRC database. (B) GO annotations for PPI network. (C) KEGG pathway analysis for PPI network. (D) Western blot analysis of HIF1A knockdown. (E) qRT-PCR results of HIF1A knockdown.

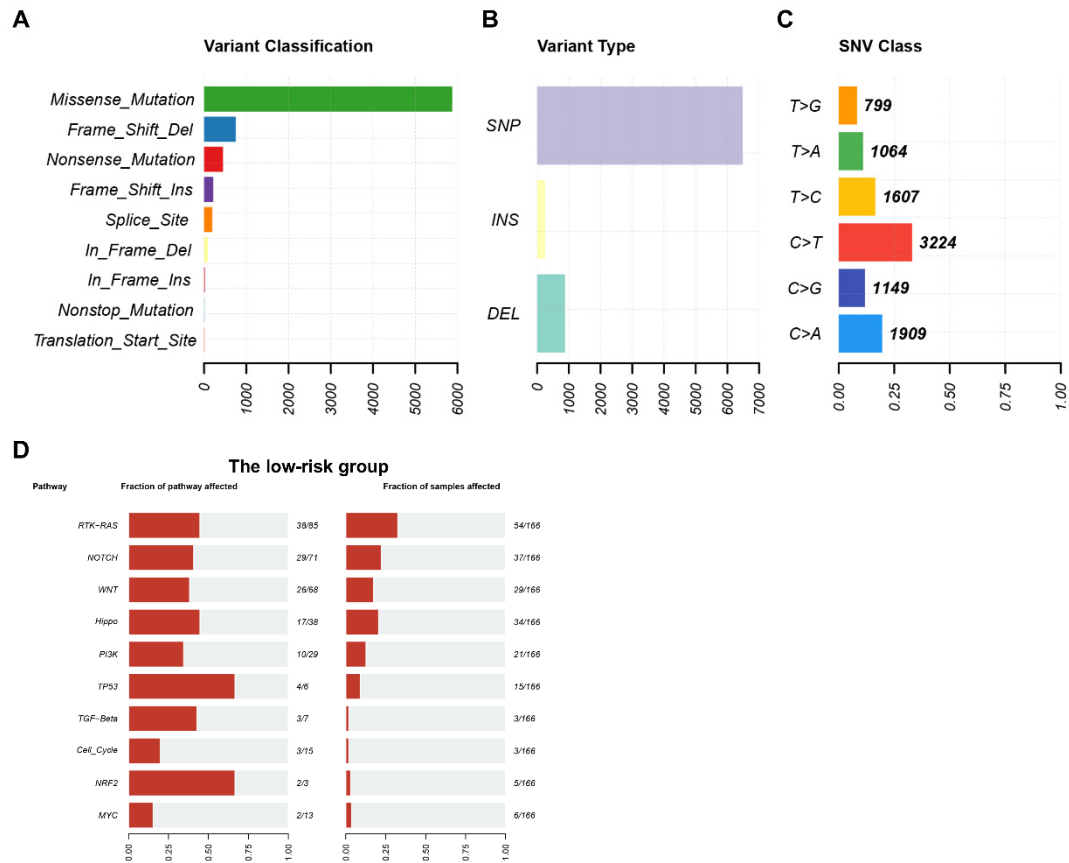

**Supplemental Figure S5. CcRCC patients with high ENO2 expression have higher levels of tumor mutation burden (TMB)**

(A-B) Gene mutation categories in the low-expression subgroup of ENO2. (C) Classification of SNVs in the low-expression subgroup of ENO2. (D) Top 10 signaling pathways enriched with mutated genes in the low-expression subgroup of ENO2.
